# Supplementary material for: Evaluation of dipole moment of polyhedral oligomeric silsesquioxane compounds
Source: Royal Society of Chemistry journal article supplement (doi:10.1039/d4dt03230f), 2024-12-02
Supplement: d4dt03230f1.pdf [file d4dt03230f1.pdf]

## Supporting information

# Evaluation of dipole moment of polyhedral oligomeric silsesquioxane compounds

*Naoki Watanabe<sup>a, b, c</sup>, Hiroaki Imoto<sup>a</sup>, Kensuke Naka<sup>a, b</sup>*

<sup>1</sup> Faculty of Molecular Chemistry and Engineering, Graduate School of Science and Technology, Kyoto Institute of Technology, Goshokaido-cho, Matsugasaki, Sakyo-ku,

Kyoto 606-8585 (Japan)

<sup>2</sup> *Materials Innovation Lab, Kyoto Institute of Technology, Goshokaido-cho,*

*Matsugasaki, Sakyo-ku, Kyoto 606-8585, Japan.*

<sup>c</sup> JNC Petrochemical Corporation, 5-1, Goikaigan, Ichihara, Chiba 290-8551 Japan.

Corresponding Author: [kenaka@kit.ac.jp](mailto:kenaka@kit.ac.jp)

### Contents:

1. Capacitance and dielectric constant of reference compound
2.  $\alpha$ -plot and  $\beta$ -plot
3. Balls and sticks models
4. Illustrations of frontier molecular orbitals

## 1. Capacitance and dielectric constant of reference compound

**Table S1.** Capacitance and dielectric constant of toluene, acetone, methanol, and pure water.

|          | $C$<br>[pF] | $\epsilon^a$<br>[-] | $\epsilon_{\text{ref}}^b$<br>[-] |
|----------|-------------|---------------------|----------------------------------|
| Toluene  | 7.7         | 3.8                 | 2.4                              |
| Acetone  | 49.7        | 24.2                | 20.7                             |
| Methanol | 76.2        | 37.0                | 32.7                             |
| Water    | 175.1       | 85.1                | 80.1                             |

Measuring conditions; temperature: 25 °C, frequency: 1 kHz, voltage: 1 V,  $C$ : measured value of capacitance,  $\epsilon^a$ : Measured value of dielectric constant,  $\epsilon_{\text{ref}}^b$ : Reference value of dielectric constant to the solute, and subscript 1/2 to the solution.

## 2. $\alpha$ -plot and $\beta$ -plot

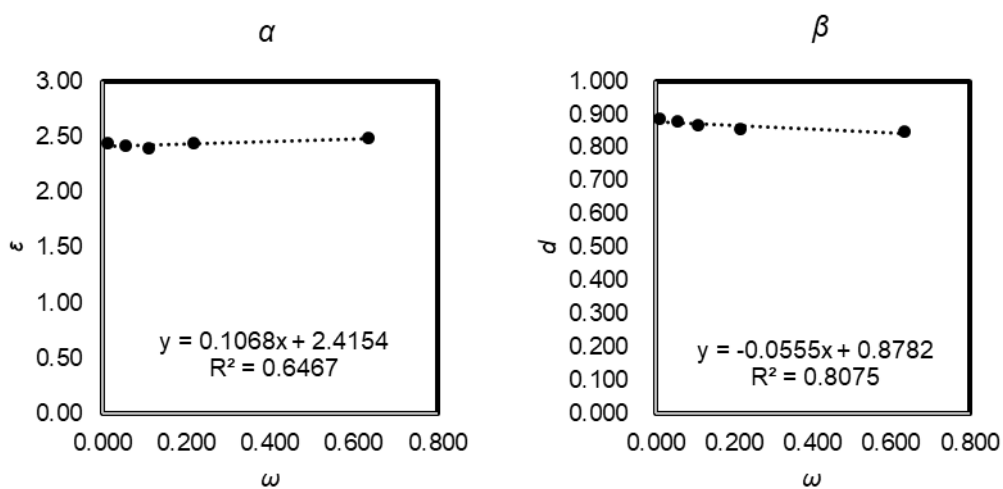

**Figure S1.** Plot of limonene solution in benzene. ( $\alpha$ ); dielectric constant to weight fraction, ( $\beta$ ); density to weight fraction.

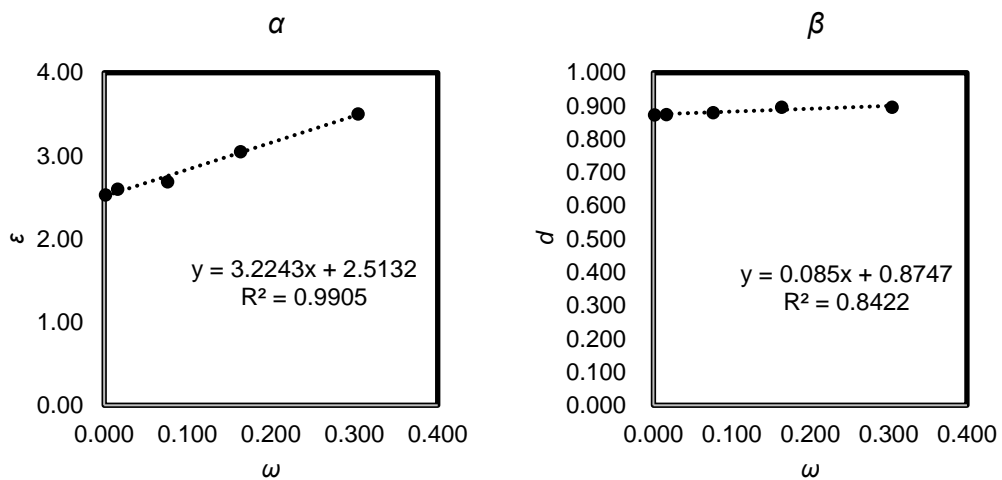

**Figure S2.** Plot of methylbenzoate solution in benzene. ( $\alpha$ ); dielectric constant to weight fraction, ( $\beta$ ); density to weight fraction.

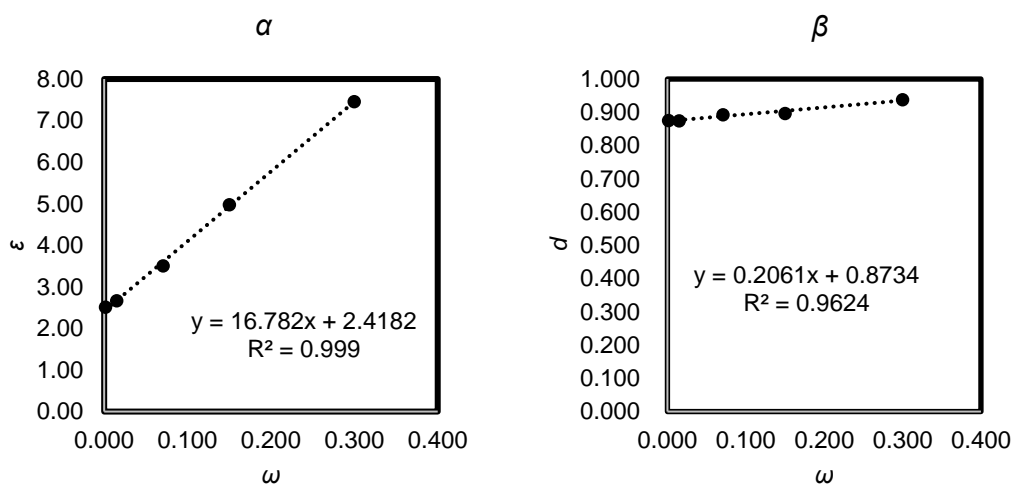

**Figure S3.** Plot of nitrobenzene solution in benzene. ( $\alpha$ ); dielectric constant to weight fraction, ( $\beta$ ); density to weight fraction.

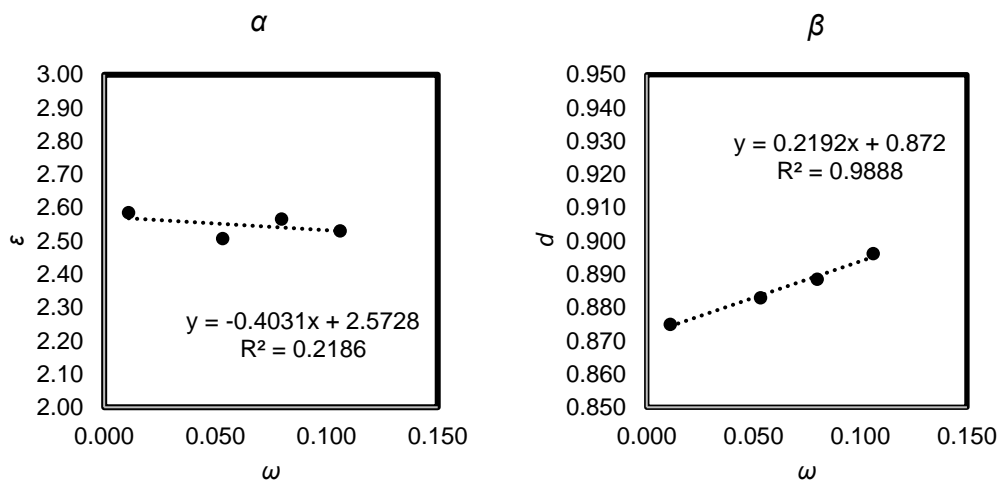

**Figure S4.** Plot of 7B1Pr-POSS solution in benzene. ( $\alpha$ ); dielectric constant to weight fraction, ( $\beta$ ); density to weight fraction.

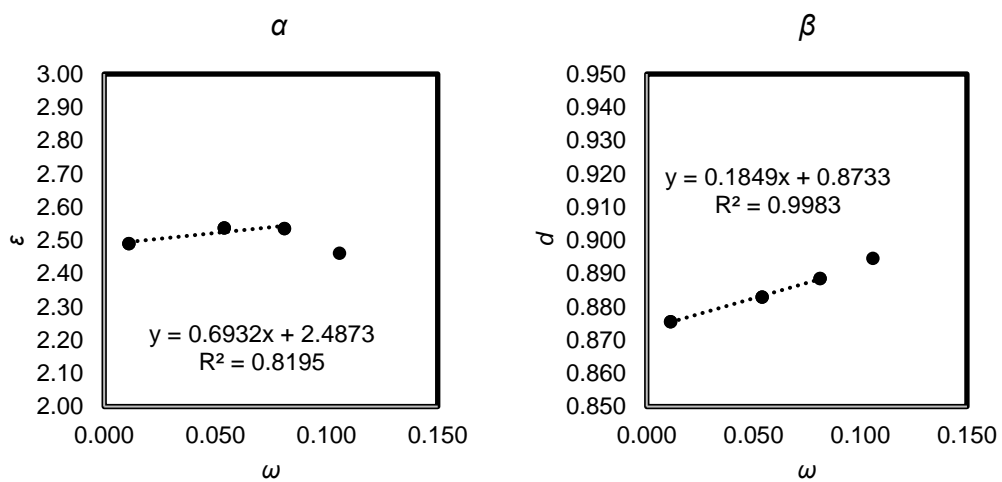

**Figure S5.** Plot of 7B1AL-POSS solution in benzene. ( $\alpha$ ); dielectric constant to weight fraction, ( $\beta$ ); density to weight fraction.

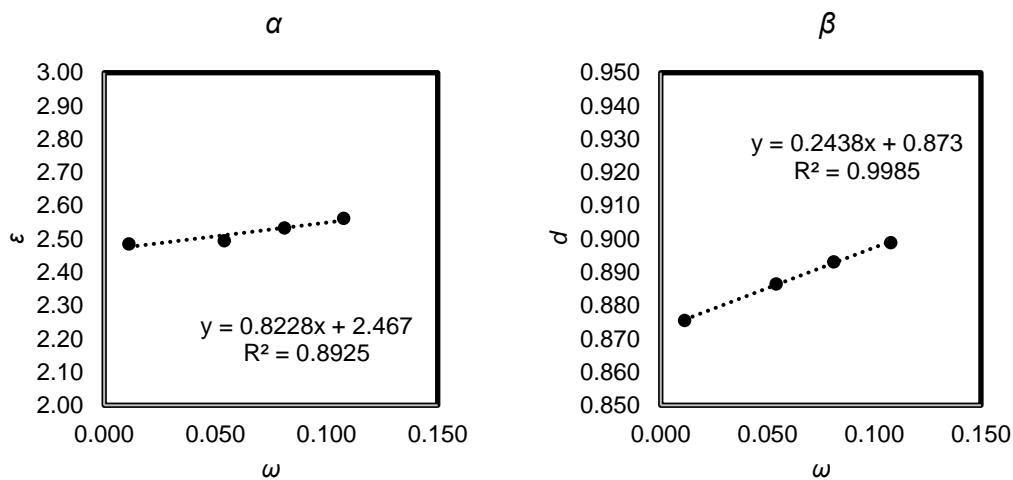

**Figure S6.** Plot of 7B1NH<sub>2</sub>-POSS solution in benzene. ( $\alpha$ ); dielectric constant to weight fraction, ( $\beta$ ); density to weight fraction.

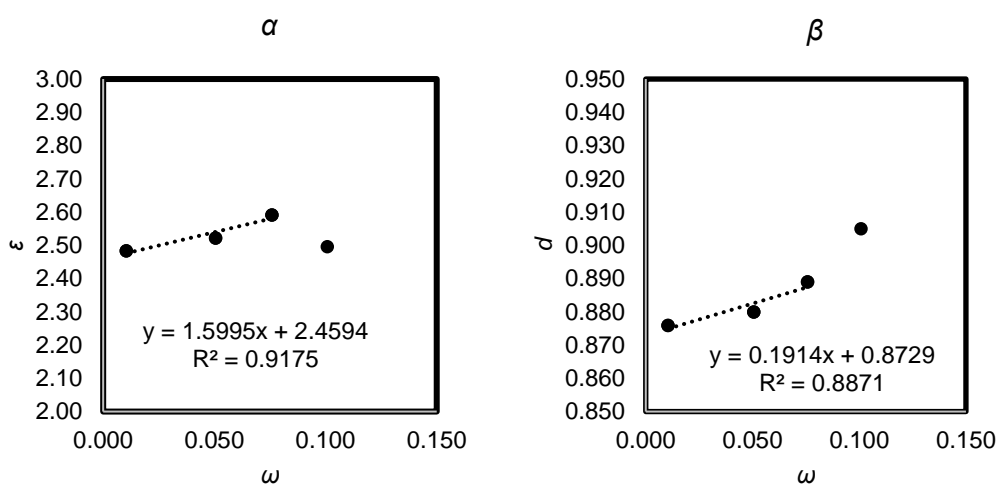

**Figure S7.** Plot of 7B1Cl-POSS solution in benzene. ( $\alpha$ ); dielectric constant to weight fraction, ( $\beta$ ); density to weight fraction.

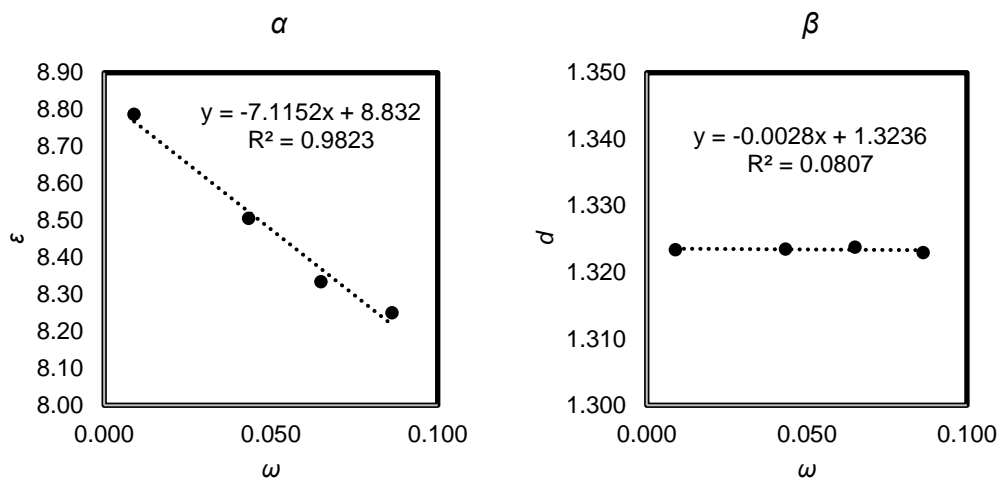

**Figure S8.** Plot of 7Ph1AL-POSS solution in dichloromethane. ( $\alpha$ ); dielectric constant to weight fraction, ( $\beta$ ); density to weight fraction.

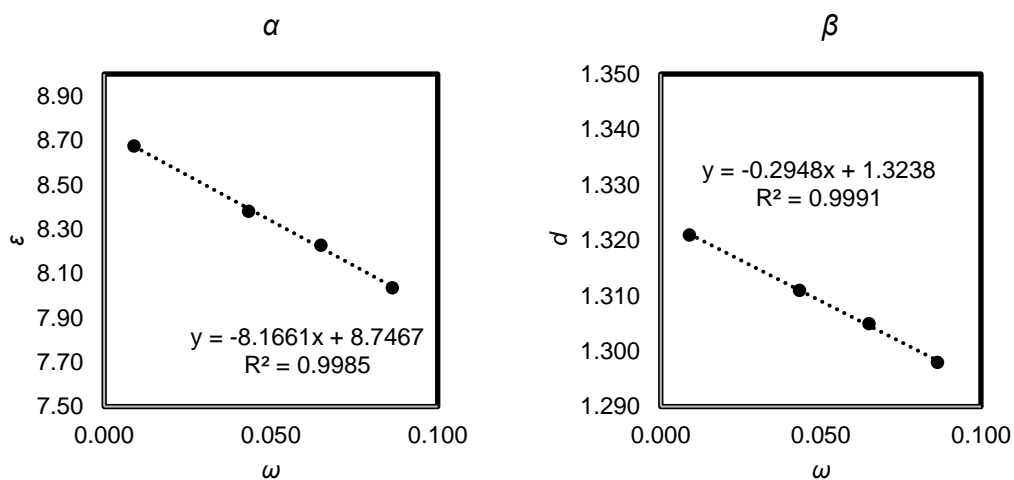

**Figure S9.** Plot of 7B1AL-POSS solution in dichloromethane. ( $\alpha$ ); dielectric constant to weight fraction, ( $\beta$ ); density to weight fraction.

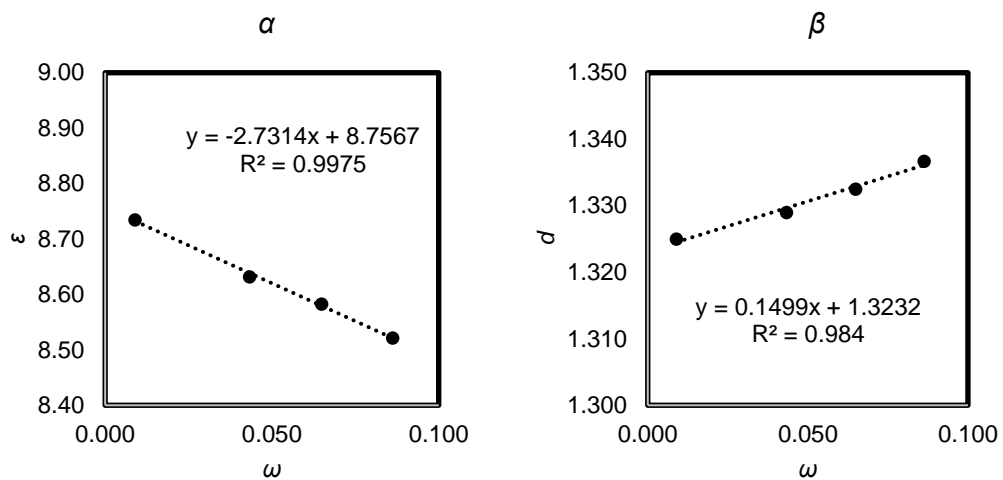

**Figure S10.** Plot of 7F1AL-POSS solution in dichloromethane. ( $\alpha$ ); dielectric constant to weight fraction, ( $\beta$ ); density to weight fraction.

### 3. Balls and sticks models

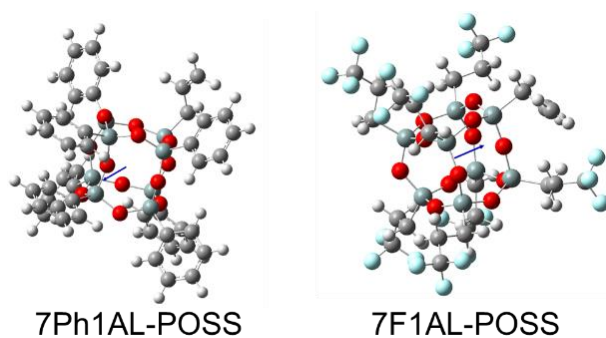

**Figure S11.** Balls and sticks models of 7Ph1AL-POSS, 7F1AL-POSS structure, optimized in vacuum, calculated from B3LYP 6-31G(d). The direction of the dipole vectors was described using blue arrow as a from their negative to their positive poles.

### 4. Illustrations of frontier molecular orbitals

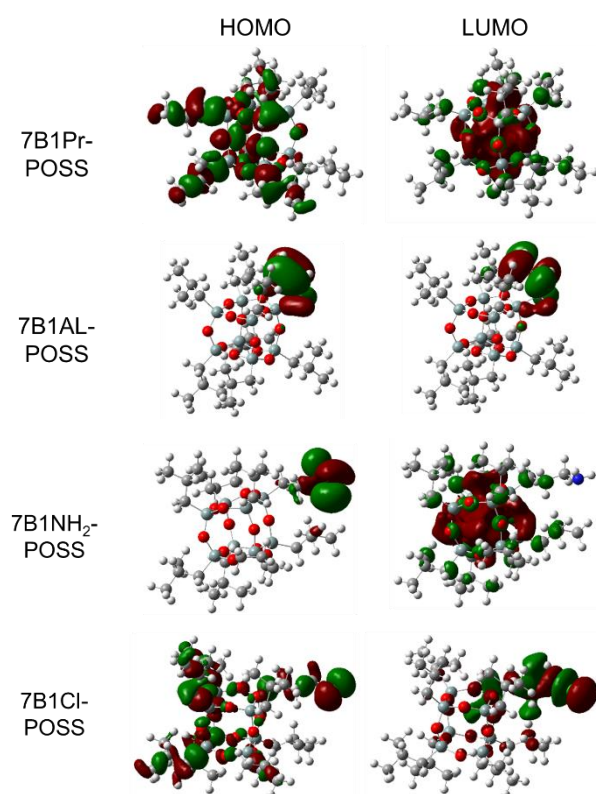

**Figure S12.** Illustrations of frontier molecular orbitals HOMO and LUMO orbital of substituted POSS calculated B3LYP/6-31G(d) level of theory (isovalue: 0.02). The green lobes represent the negative lobe, and the red lobes represent the positive lobe. The structures are visualized with GaussView 6 software.

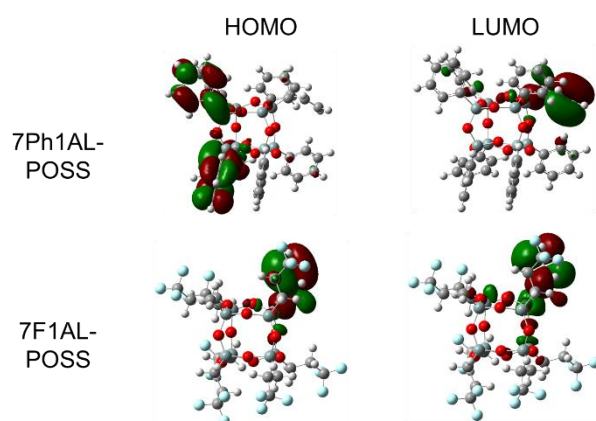

**Figure S13.** Illustrations of frontier molecular orbitals HOMO and LUMO orbital of substituted POSS calculated B3LYP/6-31G(d) level of theory (isovalue: 0.02). The green lobes represent the negative lobe, and the red lobes represent the positive lobe. The structures are visualized with GaussView 6 software.
